# Supplementary material for: Osteocytes regulate bone anabolic response to mechanical loading in male mice via activation of integrin α5
Source: PubMed Central journal article supplement (PMC9293884; doi:10.1038/s41413-022-00222-z), 2022-07-18

## Supplemental Figure Legends

**Figure S1. Deletion of integrin  $\alpha 5$  did not affect the body weight and bone mineral density.** (A) The rate of body weight gain does not differ between WT and cKO mice. n=21/group. (B) Whole-body or (C) tibial bone mineral density (BMD) measured by DEXA did not show any difference in WT and cKO mice. n=21/group. Data are expressed as mean  $\pm$  SD. Statistical analysis was performed using student unpaired t test.

**Figure S2. Deletion of integrin  $\alpha 5$  in osteocytes affect osteocyte dendrites.** (A, C) Silver-nitrate-stained images of tibial cortical bone from WT and cKO mice showed the osteocyte dendrites (in black patterns) closed to endosteal (A) and periosteal surface (C) at 37% location from the proximal bone end. Scale bar: 20  $\mu$ m. (B, D) Quantification of the lacuno-canalicular area normalized to bone area in a region closed to periosteal endosteal (B) and periosteal surface (D). n=3/group. Data are expressed as mean  $\pm$  SD. Statistical analysis was performed using student unpaired t test.

**Figure S3. Cartilage matrix was not altered after cyclic compressive loading of the knee joint.** (A) Safranin O-fast green staining of the medial articular cartilage in both WT and cKO mice. Scale bar, 50  $\mu$ m. (B) Histologic scores of cartilage degeneration revealed no damage to the cartilage matrix following mechanical loading in tibia and femur bone, for both WT and cKO mice. n=4/group. Data are

expressed as mean  $\pm$  SD. Statistical analysis was performed using paired t test for loaded and contralateral, unloaded tibias or unpaired t test for WT and cKO mice. MTP, medial tibial plateau (above); MFC, medial femoral condyle (below).

**Figure S4. Graphical depiction of the VOIs assessed by  $\mu$ CT.** A 0.65 mm height VOI starting 0.5 mm below the proximal growth plate was used to assess the trabecular bone. A 0.3 mm height VOI was used to assess cortical bone at the diaphysis 37% distal from the proximal end.

**Figure S5. Deletion of integrin  $\alpha$ 5 in osteocytes reversed the anabolic responses to mechanical loading in tibial metaphyseal trabecular bone.**  $\mu$ CT assessment of the metaphyseal trabecular bone for WT and cKO mice: (A) trabecular thickness (Tb.Th), (B) trabecular number (Tb.N), (C) trabecular separation (Tb.Sp), (D) bone volume fraction (BV/TV), (E) structure model index (SMI) and (F) bone mineral density (BMD). n=8/group. (G) Representative 3D models of the metaphyseal trabecular bone. Data are expressed as mean  $\pm$  SD. \*, P<0.05; \*\*, P<0.01. Statistical analysis was performed using paired t test for loaded and contralateral, unloaded tibias or unpaired t test between WT and cKO mice within loaded or control tibias.

**Figure S6. Deletion of integrin  $\alpha$ 5 increased osteoclasts in tibial metaphyseal trabecular bone during mechanical loading.** (A) Representative images of TRAP-positive osteoclasts (red) in tibial metaphyseal trabecular bone. Scale bar, 80

$\mu\text{m}$ . **(B)** Quantification of TRAP-positive osteoclast number per bone perimeter (N.Oc/BS) and **(C)** osteoclast surface per bone perimeter (Oc.S/BS) in tibial metaphyseal trabecular bone. n=5/group. Data are expressed as mean  $\pm$  SD. \*, P<0.05. Statistical analysis was performed using paired t test for loaded and contralateral, unloaded tibias or unpaired t test for WT and cKO mice within a loading condition.

**Figure S7. Breeding of integrin  $\alpha 5$  deficient mice.** **(A)** Breeding strategy to generate the  $\alpha 5^{flx/flx}$  and osteocyte integrin  $\alpha 5$  deficient mice. **(B)** Genomic DNA was purified from tail and PCR was performed for WT integrin  $\alpha 5$  allele, “floxed”, and 10 kb *Dmp1-Cre*.

**Figure S8. Experimental setup for *in vivo* tibia axial compressive loading.** **(A)** A strain gauge was attached to the anterior-medial surface at diaphysis 37% distal from the proximal end. **(B)** The average compliance of the relationship between applied load and resulting strain of WT and cKO mice. n=4/group. **(C)** Diagram of the left tibia positioned at the loading device and the direction of loading. **(D)** Schematic graph of 1 s of the daily 5 min loading signal. Approximately 1200  $\mu\epsilon$  was loaded on the 37% VOI. Data are expressed as mean  $\pm$  SD. Statistical analysis was performed using student unpaired t test at each time point.

Figure S1

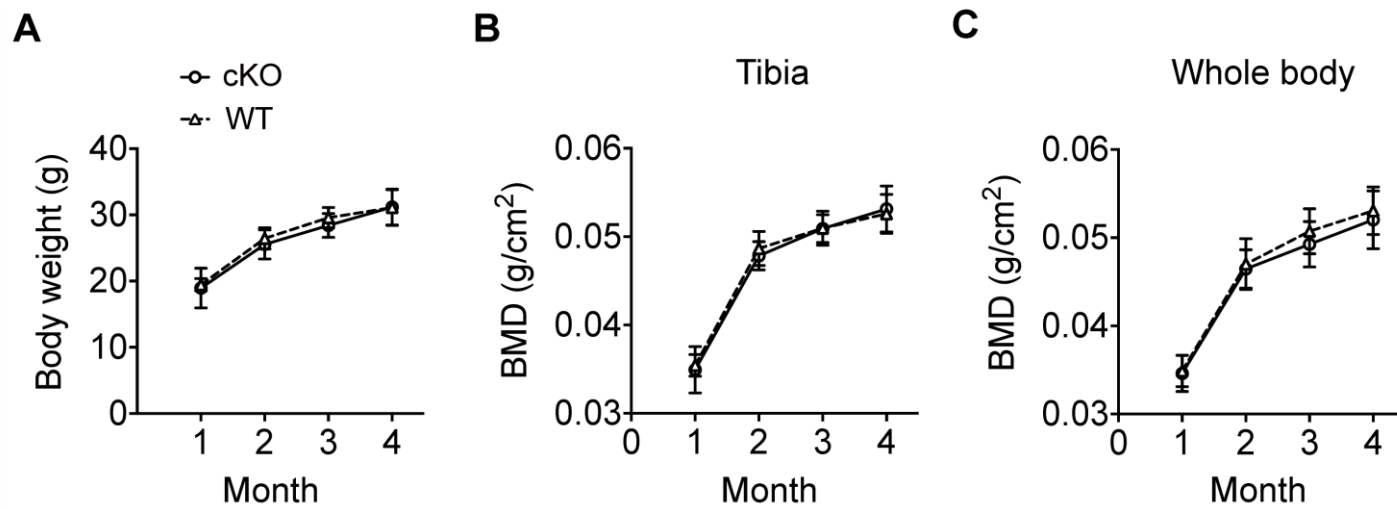

Figure S2

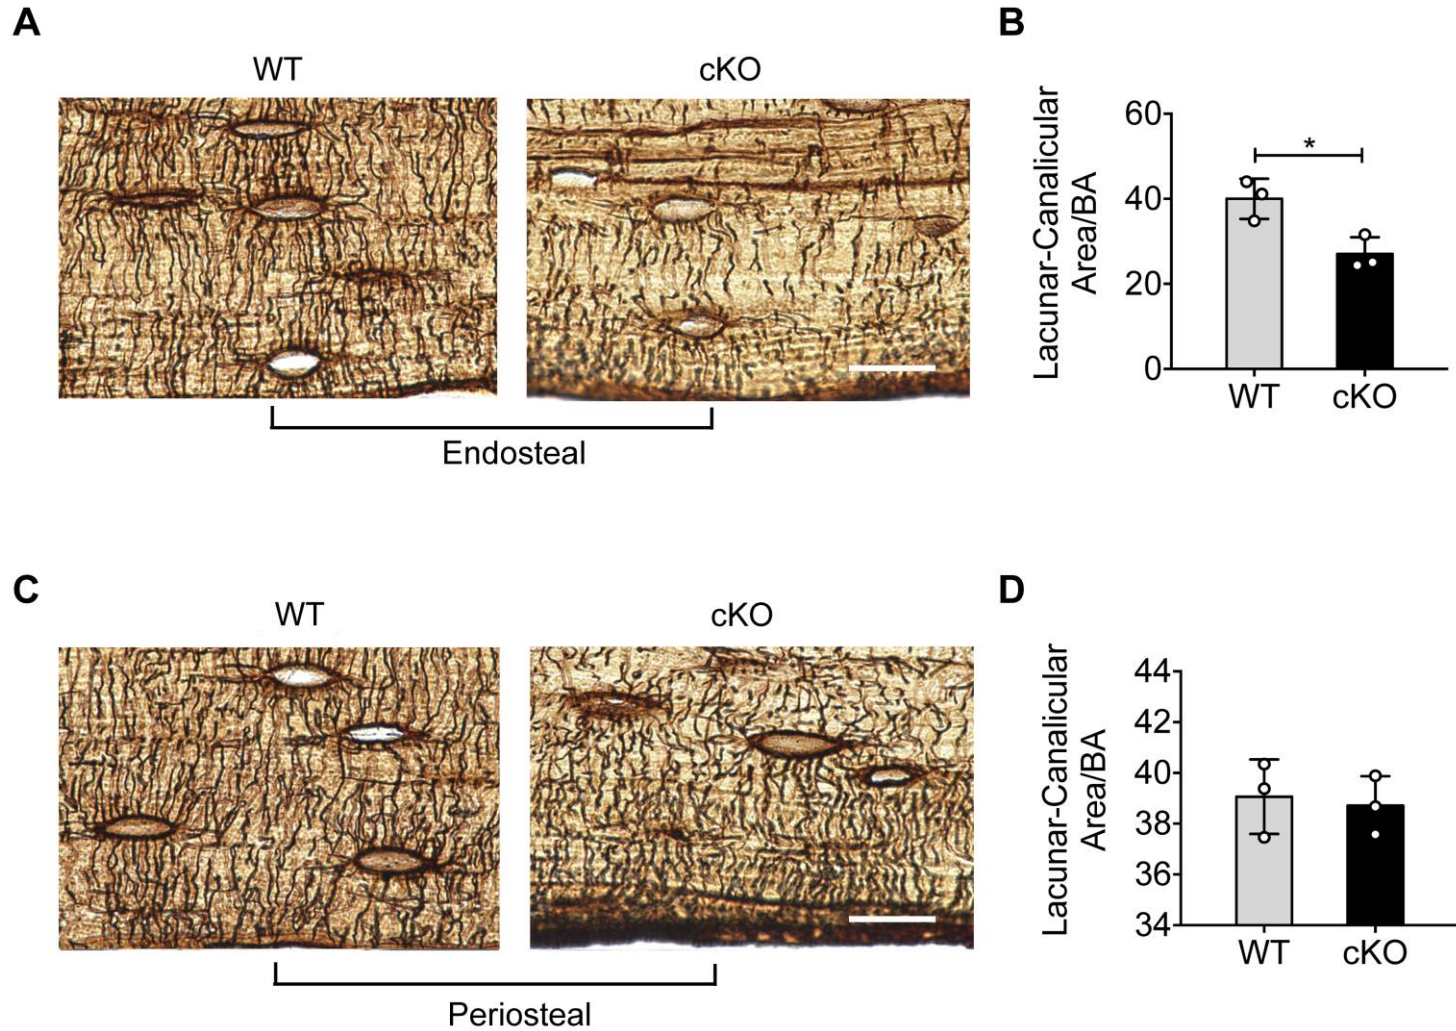

Figure S3

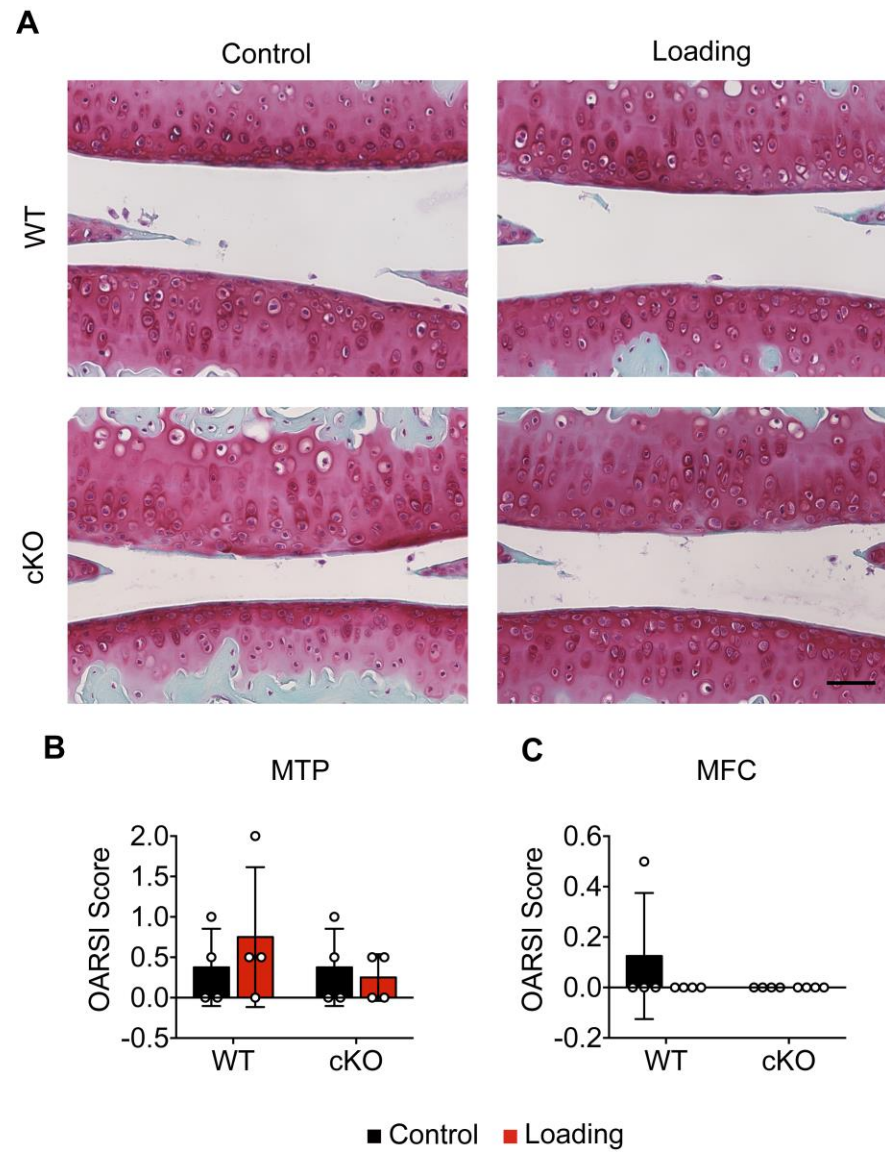

Figure S4

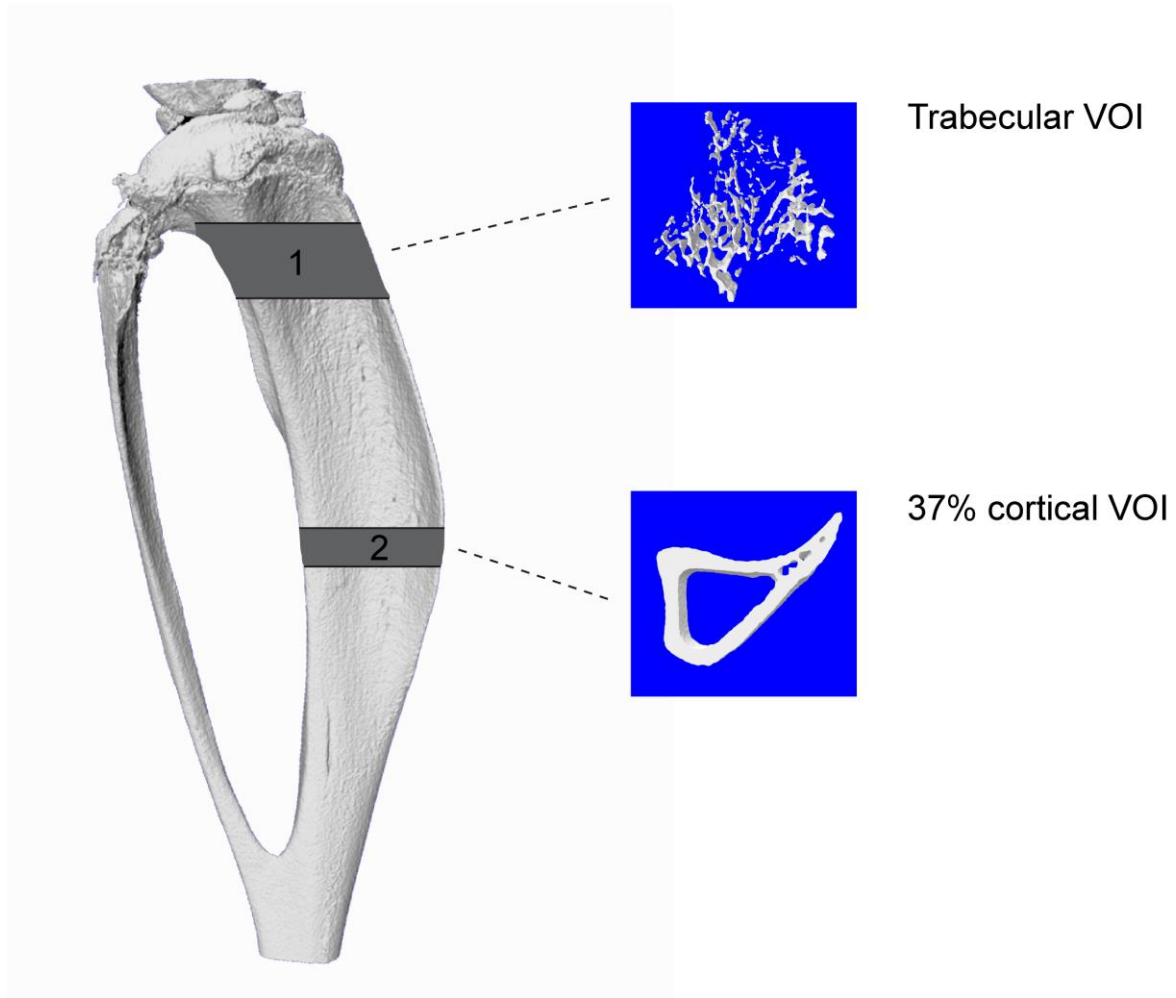



Figure S5

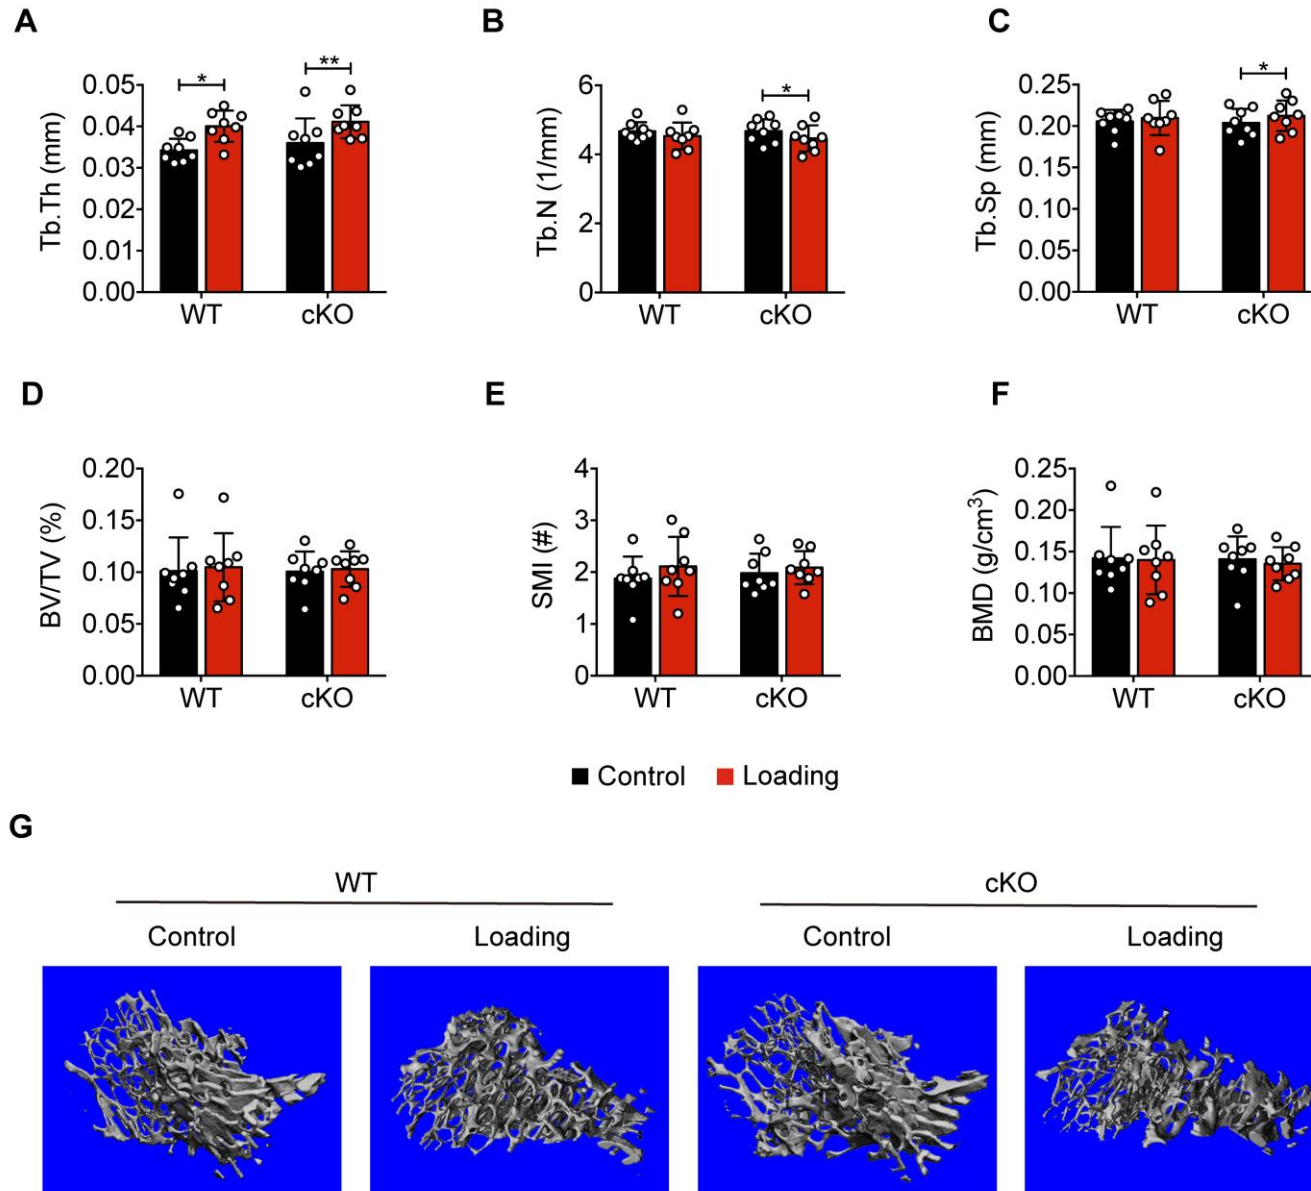





Figure S7

**A**

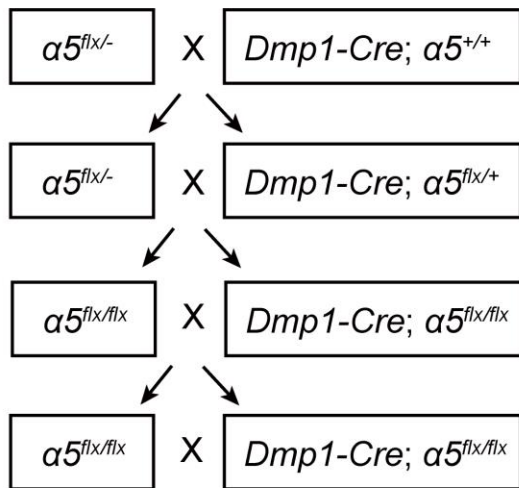

**B**

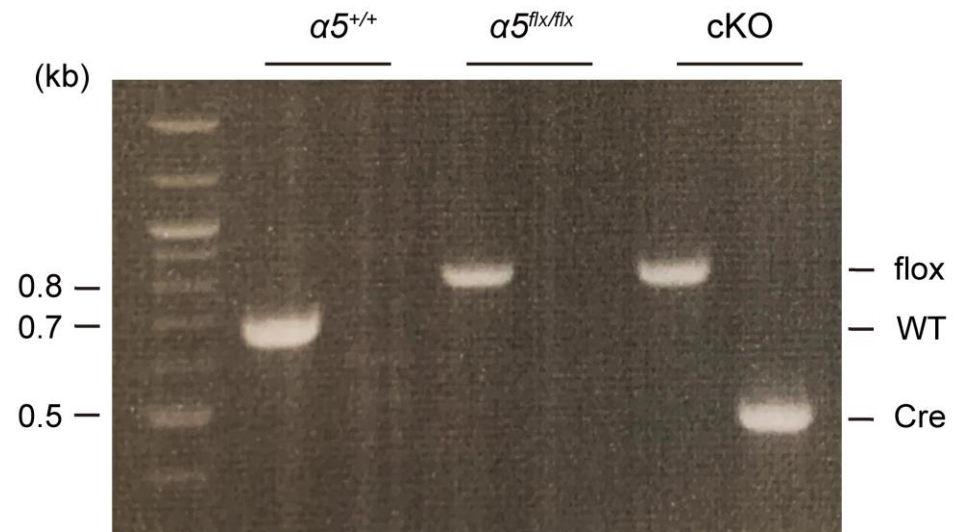

Figure S8

**A**

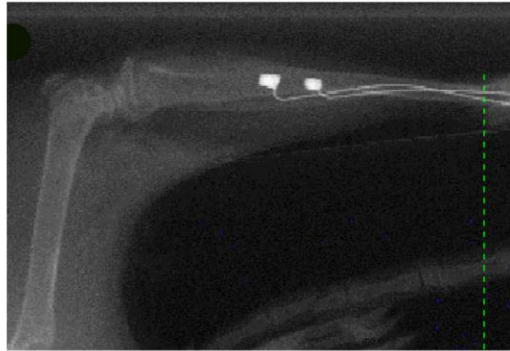

**B**

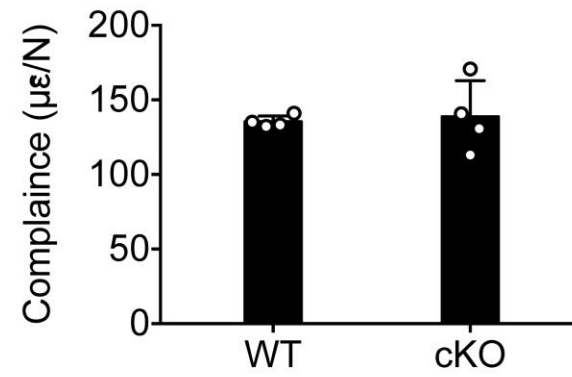

**C**

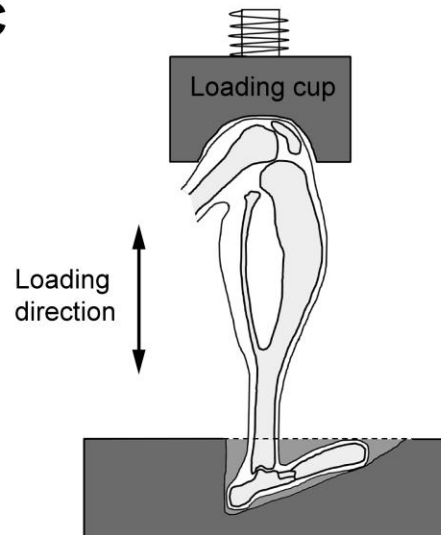

**D**

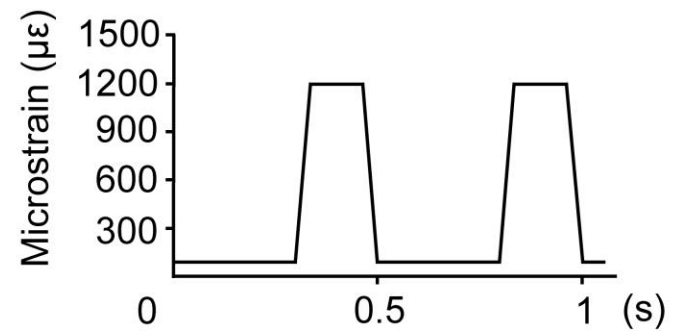

Supplement: 41413_2022_222_MOESM1_ESM.pdf [file 41413_2022_222_MOESM1_ESM.pdf]
